# Supplementary material for: The SARS-CoV-2 spike protein is vulnerable to moderate electric fields
Source: PubMed Central journal article supplement (PMC8437970; doi:10.1038/s41467-021-25478-7), 2021-09-13
Supplement: 41467_2021_25478_MOESM3_ESM.pdf [file 41467_2021_25478_MOESM3_ESM.pdf]

## Description of Additional Supplementary Files

**Supplementary Data 1.** Parameters and scripts used in the MD simulation and in the analysis tools. Analyses were performed using python  $\geq 3.7$  , mdatanalysis  $\geq 1.0.0$  ,seaborn  $\geq 0.11.0$ , scikit-learn  $\geq 0.23.2$ , scipy  $\geq 1.5.2$ . MD simulation parameters refer to those used in GROMACS 2019.4. Details are provided in the Methods section of the manuscript.
